# Supplementary material for: Characterization of Critical Determinants of ACE2–SARS CoV-2 RBD Interaction
Source: PubMed Central journal article supplement (PMC7956771; doi:10.3390/ijms22052268), 2021-02-25
Supplement: ijms-22-02268-s001.pdf [file ijms-22-02268-s001.pdf]

**Supplemental Table 1**

| Insert                                                                                     | DNA sequence             | Amino Acid sequence |
|--------------------------------------------------------------------------------------------|--------------------------|---------------------|
| <p style="text-align: center;">SmBiT-ACE2<br/>(IL12 secretion signal-<br/>ACE2-HA-His)</p> | ATGTGCCCCCAAAGTTGACCAT   | MCPQKLTISW          |
|                                                                                            | CTCATGGTTCGCAATTGTACTACT | FAIVLLVSPLM         |
|                                                                                            | AGTGAGTCCCTTGATGGCAGGCG  | AGGSGGSSGV          |
|                                                                                            | GAAGTGGAGGTTCTCTGGAGTG   | TGYRLFEEILQS        |
|                                                                                            | ACCGGATACAGGCTGTTTCGAGGA | TIEEQAKTFLD         |
|                                                                                            | GATCCTGCAGAGCACAATCGAG   | KFNHEAEDLF          |
|                                                                                            | GAGCAGGCCAAGACCTTCCTGG   | YQSSLASWNY          |
|                                                                                            | ACAAGTTTAACCACGAGGCCGA   | NTNITEENVQ          |
|                                                                                            | GGATCTGTTTTATCAGAGCTCCCT | NMNNAGDK            |
|                                                                                            | GGCCTCCTGGA ACTACAATACCA | WSAFLKEQSTL         |
|                                                                                            | ACATCACAGAGGAGAATGTGCA   | AQMYPLQEIQ          |
|                                                                                            | GAACATGAACAATGCCGGCGAC   | NLTVKLQLQA          |
|                                                                                            | AAGTGGTCTGCCTTCCTGAAGGA  | LQQNGSSVLSE         |
|                                                                                            | GCAGAGCACACTGGCCCAGATG   | DKSKRLNTILN         |
|                                                                                            | TACCCTCTGCAGGAGATCCAGAA  | TMSTIYSTGKV         |
|                                                                                            | CCTGACCGTGAAGCTGCAGCTGC  | CNPDNPQECL          |
|                                                                                            | AGGCCCTGCAGCAGAATGGCTCT  | LLEPGLNEIMA         |
|                                                                                            | AGCGTGCTGTCCGAGGATAAGTC  | NSLDYNERLW          |
|                                                                                            | TAAGCGGCTGAATACAATCCTGA  | AWESWRSEVG          |
|                                                                                            | ACACCATGAGCACAATCTATTCC  | KQLRPLYEEYV         |
|                                                                                            | ACCGGCAAGGTGTGCAATCCCG   | VLKNEMARA           |
|                                                                                            | ACAACCCTCAGGAGTGTCTGCTG  | NHYEDYGDY           |
|                                                                                            | CTGGAGCCTGGCCTGAATGAGAT  | WRGDYEVNG           |
|                                                                                            | CATGGCCAACAGCCTGGATTACA  | VDGYDYSRGQ          |

|                         |              |
|-------------------------|--------------|
| ATGAGAGGCTGTGGGCATGGGA  | LIEDVEHTFEEI |
| GTCCTGGCGCTCTGAAGTGGGCA | KPLYEHLHAY   |
| AGCAGCTGCGGCCACTGTACGA  | VRAKLMNAYP   |
| GGAGTATGTGGTGCTGAAGAACG | SYISPIGCLPAH |
| AGATGGCCAGAGCCAATCACTA  | LLGDMWGRF    |
| CGAGGACTATGGCGATTACTGGA | WTNLYSLTVPF  |
| GGGGCGACTATGAGGTGAACGG  | GQKPNIDVTD   |
| CGTGGACGGCTACGATTATAGCC | AMVDQAWDA    |
| GCGGCCAGCTGATCGAGGATGTG | QRIFKEAEKFF  |
| GAGCACACATTCGAGGAGATCA  | VSVGLPNMTQ   |
| AGCCCCTGTATGAGCACCTGCAC | GFWENSMLTD   |
| GCCTACGTGCGGGCCAAGCTGAT | PGNVQKAVC    |
| GAATGCCTATCCAAGCTACATCT | HPTAWDLGK    |
| CCCCAATCGGATGCCTGCCTGCA | GDFRILMCTK   |
| CACCTGCTGGGCGACATGTGGGG | VTMDDFLTAH   |
| CAGATTCTGGACAAACCTGTACT | HEMGHIQYD    |
| CCCTGACCGTGCCATTTGGCCAG | MAYAAQPFL    |
| AAGCCCAATATCGACGTGACCG  | RNGANEGFHE   |
| ATGCCATGGTGGACCAGGCCTGG | AVGEIMSLSAA  |
| GATGCCCAGAGGATCTTCAAGGA | TPKHLKSIGLL  |
| GGCCGAGAAGTTCTTCGTGAGCG | SPDFQEDNETE  |
| TGGGCCTGCCAAACATGACACA  | INFLKQALTI   |
| GGGCTTTTGGGAGAATAGCATGC | VGTLPFTYMLE  |
| TGACCGACCCAGGCAACGTGCA  | KWRWMVFKG    |
| GAAGGCCGTGTGCCACCCAACA  | EIPKDQWMKK   |
| GCATGGGACCTGGGCAAGGGCG  | WWEMKREIVG   |
| ATTTCCGCATCCTGATGTGCACC | VVEPVPHDET   |
| AAGGTGACAATGGACGATTTTCT | YCDPASLFHVS  |
| GACCGCCCACCACGAGATGGGC  | NDYSFIRYYTR  |

|                          |             |
|--------------------------|-------------|
| CACATCCAGTATGATATGGCATA  | TLYQFQFQEAL |
| CGCAGCACAGCCCTTCCTGCTGA  | CQAAKHEGPL  |
| GGAATGGCGCCAACGAGGGCTTT  | HKCDISNSTEA |
| CACGAGGCCGTGGGCGAGATCA   | GQKLFNMLRL  |
| TGTCTCTGAGCGCCGCCACACCT  | GKSEPWTLAL  |
| AAGCACCTGAAGAGCATCGGCC   | ENVVGAKNM   |
| TGCTGTCCCCAGACTTCCAGGAG  | NVRPLLNYFEP |
| GATAACGAGACCGAGATCAATTT  | LFTWLKDQNK  |
| TCTGCTGAAGCAGGCCCTGACCA  | NSFVGWSTDW  |
| TCGTGGGCACACTGCCCTTCACC  | SPYADQSIKVR |
| TATATGCTGGAGAAGTGGCGCTG  | ISLKSALGDKA |
| GATGGTGTTTAAGGGCGAGATCC  | YEWNDNEMY   |
| CTAAGGACCAGTGGATGAAGAA   | LFRSSVAYAM  |
| GTGGTGGGAGATGAAGCGGGAG   | RQYFLKVKNQ  |
| ATCGTGGGCGTGGTGGAGCCTGT  | MILFGEEDVRV |
| GCCACACGACGAGACCTACTGTG  | ANLKPRISFNF |
| ATCCTGCCAGCCTGTTCCACGTG  | FVTAPKNVSDI |
| TCTAACGACTATAGCTTTATCAG  | IPRTEVEKAIR |
| GTACTIONACCCGCACACTGTACC | MSRSRINDAFR |
| AGTTCCAGTTTCAGGAGGCCCTG  | LNDNSLEFLGI |
| TGCCAGGCAGCAAAGCACGAGG   | QPTLGPPNQP  |
| GCCACTGCACAAGTGTGATATC   | PVSGSGYPYDV |
| TCCAACCTACAGAGGCCCGGCCA  | PDYAYPYDVP  |
| GAAGCTGTTCAATATGCTGAGAC  | DYAYPYDVPD  |
| TGGGCAAGTCCGAGCCATGGAC   | YASSGHIEGRH |
| CCTGGCCCTGGAGAACGTGGTGG  | MLEMGHHHHH  |
| GAGCCAAGAATATGAACGTGAG   | HHHHHHH     |
| GCCTCTGCTGAATTATTTGAGC   |             |
| CACTGTTTACATGGCTGAAGGAC  |             |

|           |                                                                                                                                                                                                                                                                                                                                                                                                                                                                                                                                                                                                                                                                                                                                                                                |                               |
|-----------|--------------------------------------------------------------------------------------------------------------------------------------------------------------------------------------------------------------------------------------------------------------------------------------------------------------------------------------------------------------------------------------------------------------------------------------------------------------------------------------------------------------------------------------------------------------------------------------------------------------------------------------------------------------------------------------------------------------------------------------------------------------------------------|-------------------------------|
|           | <p>CAGAATAAGAACTCCTTTGTGGG<br/> CTGGTCCACCGACTGGTCTCCAT<br/> ACGCCGATCAGTCTATCAAGGTG<br/> AGGATCTCTCTGAAGAGCGCCCT<br/> GGGCGACAAGGCCTATGAGTGG<br/> AATGATAACGAGATGTACCTGTT<br/> CAGATCCTCTGTGGCCTATGCCA<br/> TGAGGCAGTACTTCCTGAAGGTG<br/> AGAACCAGATGATCCTGTTTGG<br/> CGAGGAGGACGTGCGGGTGGCC<br/> AATCTGAAGCCCAGAATCAGCTT<br/> TAACTTCTTTGTGACAGCCCCCA<br/> AGAACGTGAGCGATATCATCCCT<br/> CGCACCGAGGTGGAGAAGGCCA<br/> TCCGGATGAGCCGGTCCAGAATC<br/> AACGACGCCTTCAGACTGAATGA<br/> TAACAGCCTGGAGTTTCTGGGCA<br/> TCCAGCCTACCCTGGGACCACCT<br/> AATCAGCCACCCGTGTCTGGCAG<br/> CGGCTACCCATATGACGTGCCCG<br/> ATTACGCCTATCCTTACGACGTG<br/> CCAGATTATGCCTACCCCTATGA<br/> CGTGCCTGATTACGCAAGCTCCG<br/> GACACATCGAGGGCAGGCACAT<br/> GCTGGAGATGGGCCATCATCACC<br/> ATCATCACCACCACCACCACTGA</p> |                               |
| RBD-LgBiT | <p>ATGGAGACAGACACACTCCTGCTA<br/> TGGGTACTGCTGCTCTGGGTTCCAG</p>                                                                                                                                                                                                                                                                                                                                                                                                                                                                                                                                                                                                                                                                                                                 | <p>METDTLLL<br/> WVLLLVWP</p> |

|                                       |                            |           |
|---------------------------------------|----------------------------|-----------|
| (IgK leader-3XFLAG-RBD-<br>LgBiT-His) | GTTCCACTGGTGACTCTGGCTCTAG  | GSTGDSGSS |
|                                       | CGGCTCTGGCAGCGGCGACTACAA   | GSGSGDYK  |
|                                       | GGACCACGACGGTGACTACAAGGA   | DHDGDYKD  |
|                                       | CCACGACATCGACTACAAGGACGA   | HDIDYKDD  |
|                                       | CGACGACAAGGGAGGAGGAGGCT    | DDKGGGGS  |
|                                       | CTAGCGGCGGCAACATCACAAATC   | SGGNITNLC |
|                                       | TGTGCCCATTCGGCGAGGTGTTTAA  | PFGEVFNAT |
|                                       | CGCCACCAGATTTGCCAGCGTGTAT  | RFASVYAW  |
|                                       | GCCTGGAACCGGAAGAGAATCTCT   | NRKRISNCV |
|                                       | AATTGCGTGGCCGACTATAGCGTGC  | ADYSVLYNS |
|                                       | TGTACAATAGCGCCTCCTTCTCTAC  | ASFSTFKCY |
|                                       | CTTTAAGTGCTATGGCGTGTCCCC   | GVSPTKLND |
|                                       | ACAAAGCTGAACGACCTGTGCTTC   | LCFTNVYA  |
|                                       | ACCAACGTGTACGCCGACTCTTTTG  | DSFVIRGDE |
|                                       | TGATCAGGGGCGATGAGGTGCGCC   | VRQIAPGQT |
|                                       | AGATCGCACCTGGACAGACAGGCA   | GKIADYNY  |
|                                       | AGATCGCCGACTACA ACTATAAGC  | KLPDDFTGC |
|                                       | TGCCAGACGATTTACCGGCTGCGT   | VIAWNSNN  |
|                                       | GATCGCCTGGAATAGCAACAATCT   | LDSKVGGN  |
|                                       | GGATTCCAAAGTGGGCGGCAACTA   | YNYLYRLFR |
|                                       | CAATTATCTGTACCGGCTGTT CAGA | KSNLKPFR  |
|                                       | AAGAGCAACCTGAAGCCCTTTGAG   | DISTEIQAG |
|                                       | CGGGATATCAGCACAGAGATCTAC   | STPCNGVEG |
|                                       | CAGGCAGGCTCCACCCCTTGCAAC   | FNCYFPLQS |
|                                       | GGAGTGGAGGGCTTCAATTGTTATT  | YGFQPTNG  |
|                                       | TTCCCCTGCAGAGCTACGGCTTCCA  | VGYPYRV   |
|                                       | GCCTACAAATGGCGTGGGCTATCA   | VVLSFELLH |
|                                       | GCCATACAGGGTGGTGGTGTGTCC   | APATVGSSG |
|                                       | TTTGAGCTGCTGCACGCACCTGCAA  | GGGSGGGG  |

|                           |            |
|---------------------------|------------|
| CCGTGGGGAGTTCCGGTGGTGGCG  | SSGGVFTLE  |
| GGAGCGGAGGTGGAGGCTCGAGCG  | DFVGDWEQ   |
| GTGGAGTGTTCACTGGAGGACTT   | TAAYNLDQ   |
| TGTGGGCGATTGGGAGCAGACCGC  | VLEQGGVSS  |
| CGCCTACAACCTGGACCAGGTGCT  | LLQNLAHSV  |
| GGAGCAGGGAGGCGTGTCTCTCT   | TPIQRIVRSG |
| GCTGCAGAATCTGGCCGTGTCTGTG | ENALKIDIH  |
| ACACCAATCCAGAGGATCGTGCGC  | VIIPYEGLSA |
| AGCGGCGAGAACGCCCTGAAGATC  | DQMAQIEE   |
| GACATCCACGTGATCATCCCCTACG | VFKVVYPVD  |
| AGGGCCTGTCCGCCGATCAGATGG  | DHHFKVILP  |
| CCCAGATCGAGGAGGTGTTCAAGG  | YGTLVIDGV  |
| TGGTGTATCCAGTGGACGATCACCA | TPNMLNYF   |
| CTTCAAAGTGATCCTGCCCTACGGC | GRPYEGIAV  |
| ACCCTGGTCATCGACGGAGTGACC  | FDGKKITVT  |
| CCCAACATGCTGAATTATTCGGCC  | GTLWNGNK   |
| GGCCTTACGAGGGCATCGCCGTGTT | IIDERLITPD |
| TGATGGCAAGAAGATCACCGTGAC  | GSMLFRVTI  |
| AGGCACCCTGTGGAACGGCAATAA  | NSSSGHIEG  |
| GATCATCGACGAGCGGCTGATCAC  | RHMLEMGH   |
| ACCTGATGGCTCCATGCTGTTCAGA | HHHHHHHH   |
| GTGACCATCAACTCCTCCTCTGGAC | HH         |
| ACATCGAGGGCCGCCACATGCTGG  |            |
| AGATGGGCCATCATCACCATCATC  |            |
| ACCACCACCACACTGA          |            |
